# Supplementary material for: Integration of liver gene co-expression networks and eGWAs analyses highlighted candidate regulators implicated in lipid metabolism in pigs
Source: PubMed Central journal article supplement (PMC5396199; doi:10.1038/srep46539), 2017-04-19
Supplement: srep46539-s1.pdf [file srep46539-s1.pdf]

## **SUPPLEMENTARY MATERIAL**

### **Integration of liver gene co-expression networks and eGWAs analyses highlighted candidate regulators implicated in lipid metabolism in pigs**

Maria Ballester<sup>1,2,3\*</sup>, Yulixaxis Ramayo-Caldas<sup>1,2,4</sup>, Manuel Revilla<sup>1,2</sup>, Jordi Corominas<sup>1,2</sup>, Anna Castelló<sup>1,2</sup>, Jordi Estellé<sup>4</sup>, Ana I. Fernández<sup>5</sup>, Josep M. Folch<sup>1,2</sup>

<sup>1</sup>Departament de Ciència Animal i dels Aliments, Facultat de Veterinària, Campus UAB, Bellaterra, 08193, Barcelona, Spain

<sup>2</sup>Plant and Animal Genomics, Centre de Recerca en Agrigenòmica (Consorci CSIC-IRTA-UAB-UB), Edifici CRAG, Campus UAB, Bellaterra, 08193, Barcelona, Spain

<sup>3</sup>IRTA, Genètica i Millora Animal, Torre Marimon, 08140 Caldes de Montbui, Spain

<sup>4</sup>Génétique Animale et Biologie Intégrative, Institut National de la Recherche Agronomique, AgroParisTech, Université Paris-Saclay, Jouy-en-Josas, France

<sup>5</sup>Departamento de Mejora Genética Animal, INIA, Ctra. de la Coruña km. 7, 28040, Madrid, Spain

\*E-mail: [maria.ballester@irta.cat](mailto:maria.ballester@irta.cat)

**Figure S1.** Evidence of interactions between *FABP1*, *FADS1*, *FADS2*, *PPAR $\alpha$*  and *SREBP1c* using GeneMANIA.

**Figure S2.** Plot of GWAS for *FADS1*, *FADS2* and *FADS3* gene expression in liver. Association analysis between the liver *FADS1* (A), *FADS2* (B) and *FADS3* (C) expression level and genotypes of markers included in the Porcine SNP60 Bead-Chip (Illumina). The X-axis represents the chromosomes, and the Y-axis shows the  $-\log_{10}$  (p-value).

**Table S1.** Mean comparison of liver gene expression levels of 43 lipid-related genes between males and females.

**Table S2.** Topological mean parameters of male and female liver co-expression networks.

**Table S3.** Description of the 92 significant expression-associated SNPs (eSNPs).

**Table S4.** List of genes annotated in the seven chromosomal regions associated with gene expression phenotypes.

**Table S5.** Top-five associated networks and molecules from the list of genes annotated in the seven eQTLs based on IPA

**Table S6.** Description of the 17 significant *cis*-eSNPs at chromosome level.

**Table S7.** Significant co-expression values among genes regulated by the hotspots on SSC8.

**Table S8.** Positional concordance among the 92 eSNPs and QTLs deposited in the pig QTL database for fatness and fat composition related traits.

**Table S9.** List of primers for the RT-qPCR analysis.

**Figure S1.** Evidence of interactions between *FABP1*, *FADS1*, *FADS2*, *PPAR $\alpha$*  and *SREBF1c* using GeneMANIA.

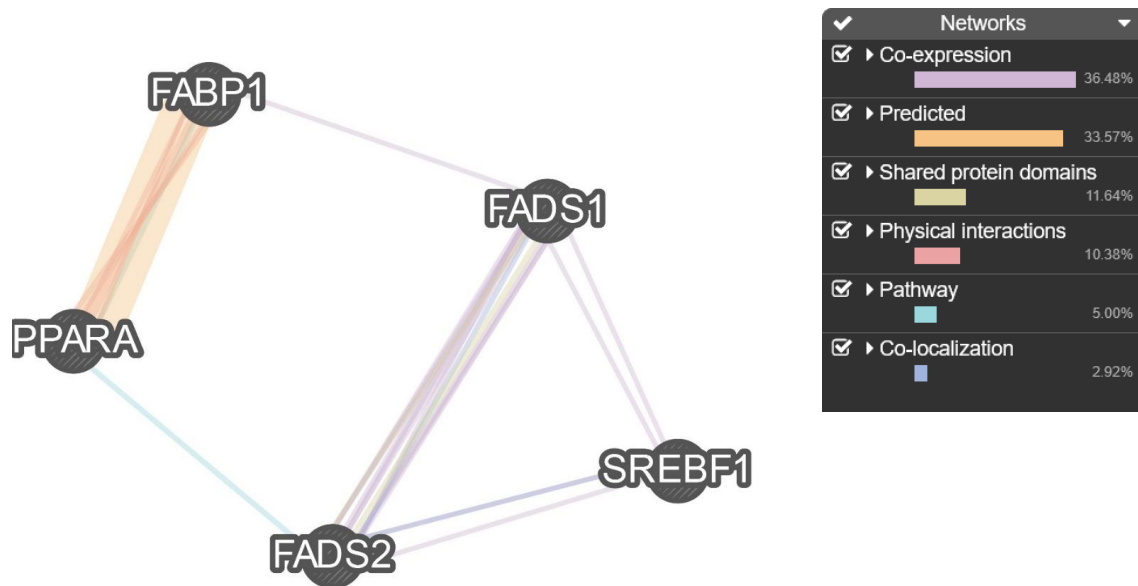

**Figure S2.** Plot of GWAS for *FADS1*, *FADS2* and *FADS3* gene expression in liver. Association analysis between the liver *FADS1* (A), *FADS2* (B) and *FADS3* (C) expression level and genotypes of markers included in the Porcine SNP60 Bead-Chip (Illumina). The X-axis represents the chromosomes, and the Y-axis shows the  $-\log_{10}$  (p-value).

(A)

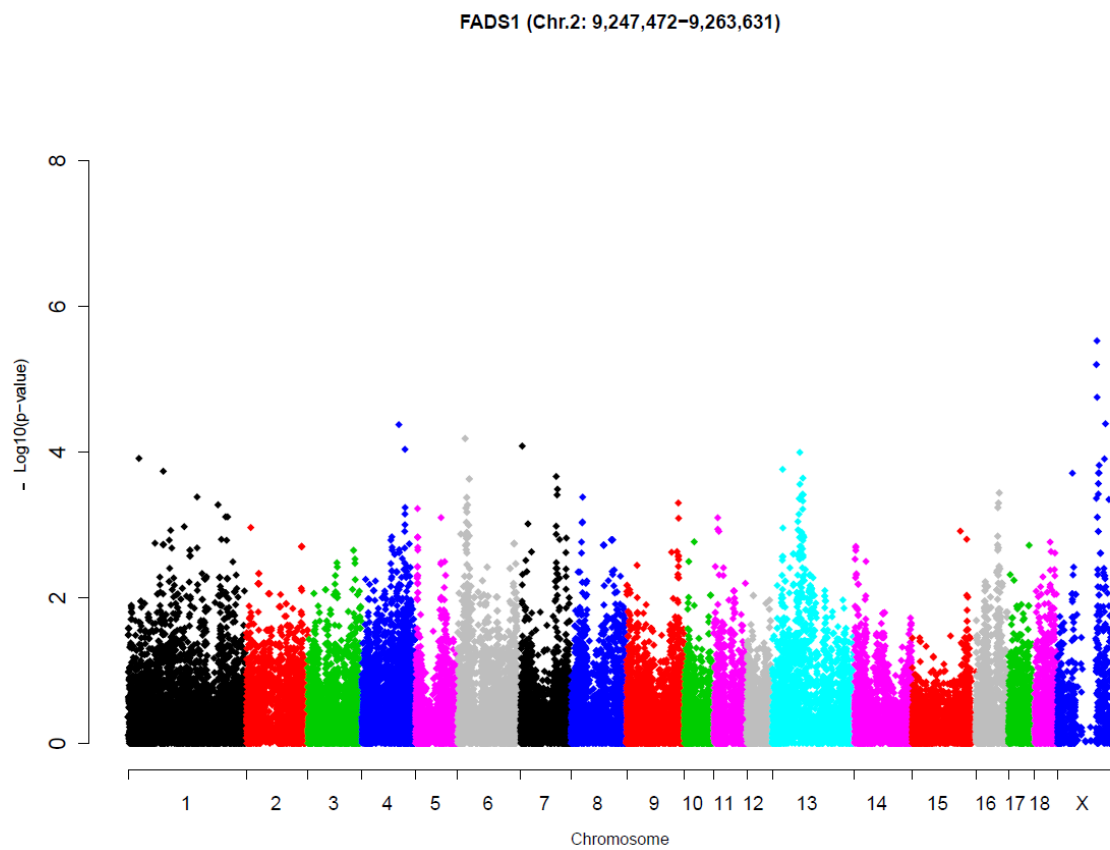

**(B)**

FADS2 (Chr.2: 9,119,389-9,152,215)

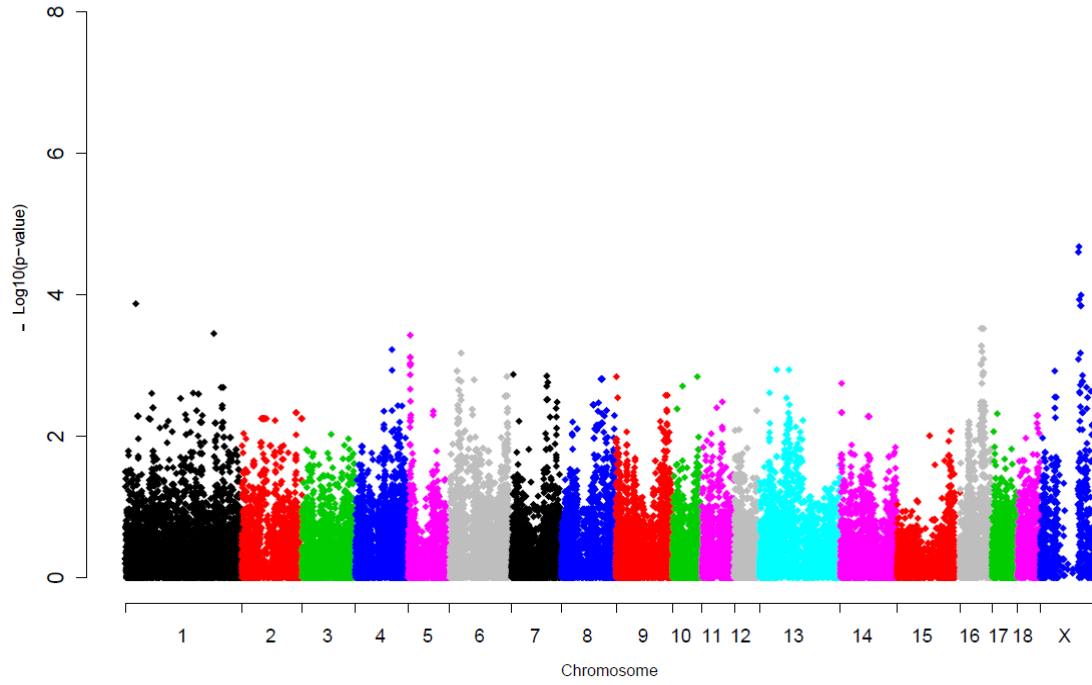

**(C)**

FADS3 (Chr.2: 9,157,720-9,178,637)

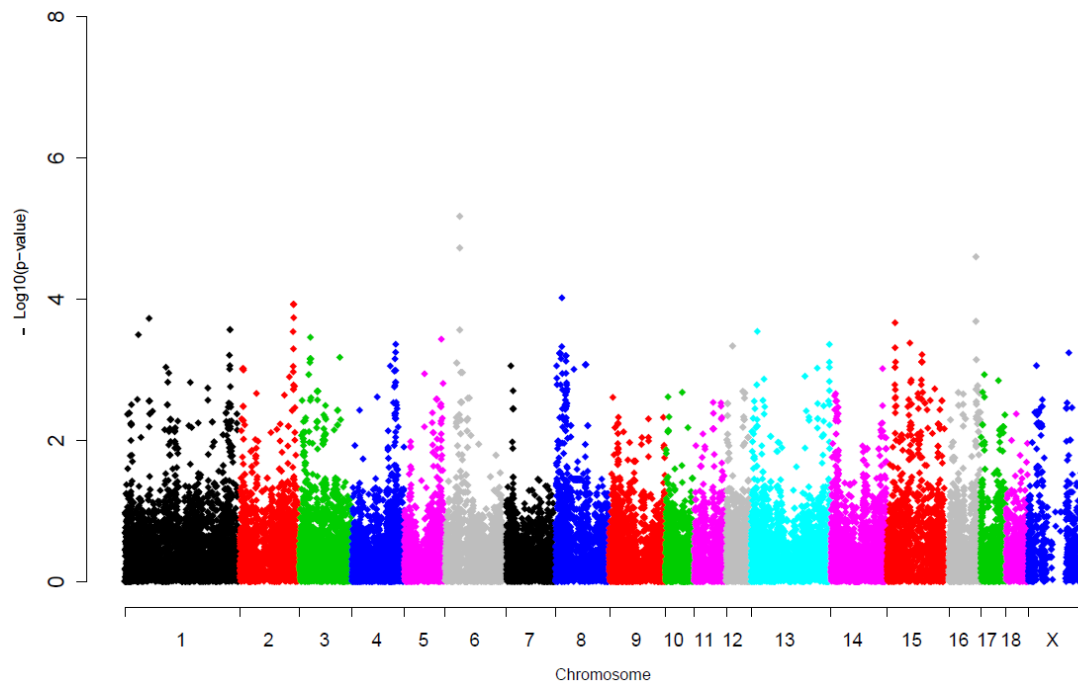

**Table S1.** Mean comparison of liver gene expression levels of 43 lipid-related genes between males and females.

| <b>Gene</b> | <b>Mean in Male</b> | <b>Mean in Female</b> | <b>P-value</b> |
|-------------|---------------------|-----------------------|----------------|
| ABCG8       | 1.10638507          | 1.32735359            | 4.05E-004      |
| ACSM5       | 0.79516155          | 1.1851219             | 2.22E-010      |
| AGPAT2      | 1.19071574          | 1.38563175            | 5.07E-003      |
| APOA2       | 0.20550265          | 0.02713742            | 2.41E-001      |
| APOB        | -0.02306437         | 0.11954847            | 1.32E-002      |
| ARNT        | 0.79698145          | 1.05437107            | 3.40E-006      |
| CPT1A       | 0.29427247          | 0.16898876            | 3.37E-001      |
| CROT        | 0.26698294          | -0.66364779           | 1.47E-008      |
| CYP2U1      | 0.82864276          | 1.03923552            | 8.59E-003      |
| CYP7A1      | -2.44494517         | -0.05319579           | 4.03E-009      |
| DGAT1       | -0.41921145         | 0.36465435            | 1.30E-015      |
| EGF         | -1.22717633         | -0.85612796           | 3.78E-004      |
| ELOVL5      | 1.06074307          | 1.23407169            | 1.00E-002      |
| ELOVL6      | 0.73797252          | 0.84591396            | 5.52E-002      |
| ESRRA       | 0.34666028          | 0.30251565            | 3.73E-001      |
| FABP1       | -0.59242455         | -0.57381859           | 9.66E-001      |
| FABP5       | -0.92984332         | -0.72534364           | 2.05E-001      |
| FADS1       | -1.72876913         | -0.72295389           | 2.02E-006      |
| FADS2       | -1.47984864         | -0.29575868           | 1.75E-008      |
| FADS3       | -0.10099681         | 0.17610714            | 1.28E-004      |
| FOXA1       | 0.22632908          | 0.4291075             | 2.08E-002      |
| HADH        | 0.06495191          | 0.22201133            | 4.85E-002      |
| HNF4A       | 1.09180931          | 1.17050052            | 1.65E-001      |
| HNF4G       | 0.7645411           | 0.83374403            | 1.63E-001      |
| KLF10       | 0.03005835          | 0.13973121            | 2.20E-001      |
| LIPC        | 0.86223939          | 1.08434376            | 1.88E-006      |
| LPIN1       | -0.56350028         | 0.17233961            | 2.53E-006      |

|          |             |            |           |
|----------|-------------|------------|-----------|
| MLXIPL   | 1.00207993  | 1.51263934 | 5.10E-007 |
| MTTP     | 0.71398821  | 0.74801256 | 1.22E-001 |
| NFKB1    | 0.87144002  | 0.97034133 | 2.84E-005 |
| NR1H3    | 0.32850425  | 0.49924015 | 3.74E-003 |
| PLA2G12A | 0.94732107  | 0.97141924 | 3.61E-001 |
| PLCB2    | -0.02181955 | 0.32819592 | 9.73E-006 |
| POU2F1   | 0.08581884  | 0.22957523 | 3.26E-002 |
| PPAP2A   | -0.19031833 | 0.0091592  | 1.51E-004 |
| PPARA    | 0.87208797  | 1.08429168 | 7.95E-005 |
| PPARD    | 0.41621572  | 0.26473171 | 1.91E-001 |
| PPARGC1A | -0.14427855 | 0.01644963 | 1.71E-002 |
| PEX2     | -0.07879949 | 0.30253662 | 1.34E-005 |
| SCAP     | 0.34398852  | 0.64865395 | 2.06E-005 |
| SCD1     | -0.34087252 | 0.32686898 | 5.34E-005 |
| SREBF1   | -0.72304021 | 0.36053337 | 3.08E-012 |
| USF1     | 1.11536894  | 1.16965193 | 9.58E-002 |

---

**Table S2.** Topological mean parameters of male and female liver co-expression networks.

| <b>Topological parameters</b> | <b>Female</b> | <b>Male</b> |
|-------------------------------|---------------|-------------|
| Average Distance              | 1.76655052    | 1.45876887  |
| Centroid mean value           | -12.5952381   | -11.5       |
| Closeness mean value unDir    | 0.01406093    | 0.01705652  |
| Degree mean value             | 14.2380952    | 22.9047619  |
| Eccentricity mean value       | 0.34126984    | 0.4484127   |
| Radiality mean value          | 3.23344948    | 2.54123113  |
| Stress mean value             | 251.380952    | 201.666667  |



**Table S4.** List of genes annotated in the seven chromosomal regions associated with gene expression phenotypes.

| <b>Gene list</b> |          |          |          |        |
|------------------|----------|----------|----------|--------|
| ABCC5            | DGKG     | LARP7    | POU4F2   | VPS8   |
| ABCE1            | DIAPH1   | LEF1     | PPA2     | VWA5B2 |
| ABCF3            | DKK2     | LIPH     | PPP1R42  | XKR9   |
| ACTL6A           | DNAJB11  | LRIT3    | PRDM14   | YEATS2 |
| ADHFE1           | DNAJC19  | LSM6     | PREX2    | ZMAT3  |
| AHSG             | DNAJC5B  | MAGEF1   | PRMT9    | ZNF827 |
| AIMP1            | DVL3     | MAP3K13  | PSMD2    |        |
| ALG3             | ECE2     | MASP1    | RELL2    |        |
| ALPK1            | EDNRA    | MCCC1    | RFC4     |        |
| ANAPC10          | EIF2B5   | MCF2L2   | RNF14    |        |
| ANK2             | EIF4A2   | MCMDC2   | RPL34    |        |
| AP1AR            | EIF4G1   | MMAA     | RRH      |        |
| AP2M1            | ELOVL6   | MRPL47   | RRS1     |        |
| ARAP3            | ENPEP    | MSC      | RTP1     |        |
| ARFGEF1          | EPHB3    | MTFR1    | RTP2     |        |
| ARHGAP10         | ETNPPL   | MYBL1    | SEC24B   |        |
| ARHGAP26         | EYA1     | NAALADL2 | SENP2    |        |
| ARHGEF38         | FAM131A  | NCOA2    | SGK3     |        |
| ARMC1            | FCHSD1   | NDFIP1   | SGMS2    |        |
| ARSJ             | FETUB    | NDUFB5   | SLC10A7  |        |
| ATP11B           | FGF1     | NLGN1    | SLCO5A1  |        |
| B3GNT5           | FXR1     | NPNT     | SOX2     |        |
| BCL6             | GAR1     | NR3C1    | SPRY4    |        |
| C8orf34          | GNPDA1   | NR3C2    | SST      |        |
| C8orf46          | GSTCD    | OSTC     | SULF1    |        |
| CALM1            | HADH     | OTUD4    | TAF7     |        |
| CAMK2D           | HDAC3    | PARL     | TBCCD1   |        |
| CAMK2N2          | HHIP     | PCDH1    | TBCK     |        |
| CASP6            | HRG      | PCDH12   | TBL1XR1  |        |
| CCDC109B         | HTR3C    | PCDHB16  | THPO     |        |
| CCDC39           | HTR3D    | PCDHGA12 | TIFA     |        |
| CFI              | IGF2BP2  | PCDHGA8  | TMEM184C |        |
| CHRD             | INTS12   | PCDHGA9  | TMEM41A  |        |
| CLCN2            | KCNMB2   | PCDHGB5  | TRAM1    |        |
| COPS5            | KCNMB3   | PCDHGC5  | TRIM55   |        |
| CPA6             | KIAA0141 | PDE7A    | TRPA1    |        |
| CRH              | KLHL24   | PEX5L    | TTC14    |        |
| CRYGS            | KLHL6    | PIK3CA   | TTC29    |        |
| CSPP1            | KNG1     | PITX2    | UGT8     |        |
| CYP2U1           | LACTB2   | PLA2G12A | USP13    |        |
| DCUN1D1          | LAMP3    | POLR2H   | VCPIP1   |        |

**Table S5.** Top-five associated networks and molecules from the list of genes annotated in the seven eQTLs based on IPA.

| ID | Molecules in Network                                                                                                                                                                                                                                                                                               | Score | Focus Molecules | Top Diseases and Functions                                                                                               |
|----|--------------------------------------------------------------------------------------------------------------------------------------------------------------------------------------------------------------------------------------------------------------------------------------------------------------------|-------|-----------------|--------------------------------------------------------------------------------------------------------------------------|
| 1  | Akt,ARAP3,ARFGEF1,C8orf44-SGK3/SGK3,CASP6,caspase,CPA6,DIAPH1,DNAJB11,DNAJC19,DNAJC5B,EIF2B5,EPHB3,EYA1,FABP1,GTPase,Hdac,HSP,Hsp70,Hsp90,Hsp22/Hsp40/Hsp90,KIAA0141,LSM6,Mlc,MSC,NDFIP1,PITX2,PP2A,PRDM14,PREX2,SEC24B,SOX2,TRIM55,trypsin,USP13                                                                  | 45    | 24              | Cellular Development, Digestive System Development and Function, Auditory and Vestibular System Development and Function |
| 2  | AHSG,ANK2,C/ebp,CAMK2N2,Cbp/p300,Creb,CRH,Cyclin A,DKK2,ELOVL6,ERK1/2,estrogen receptor,FGF1,Fgfr,HDAC3,HDL,histone deacetylase,Histone h4,LEF1,LIPH,N-cor,NCOA2,NCoR/SMRT corepressor,NLGN1,Nr1h,NR3C2,PCDH1,Pias,RNF14,SPRY4,SULF1,TB L1XR1,TTC29,UGT8,Wnt                                                       | 35    | 20              | Organismal Development, Endocrine System Disorders, Gastrointestinal Disease                                             |
| 3  | AIMP1,Alpha Actinin,Ap1,ATP11B,B3GNT5,CAMK2D,Caspase 3/7,CD3,CHRD,DVL3,ENPEP,FABP5,FETUB,Fibrinogen,HRG,IgG,IKK (complex),IL1,KNG1,MAP3K13,Mapk,Mek,MYBL1,NFkB (complex),p70 S6k,p85 (pik3r),PDGF BB,PIK3CA,Ras,SENP2,Sos,Tgf beta,THPO,TIFA,TRPA1                                                                 | 31    | 18              | Post-Translational Modification, Cellular Growth and Proliferation, Hematological System Development and Function        |
| 4  | 26s Proteasome,Actin,ACTL6A,ADCY,ARMC1,CALM1 (includes others),Calmodulin,Cg,CLCN2,EIF4A2,EIF4G1,ERK,FXR1,GNRH,HADH ,HISTONE,Histone h3,Insulin,MEF2,NR3C1,PI3K (complex),Pka,Pka catalytic subunit,PLC,POLR2H,Proinsulin,PSMD2,RFC4,RNA polymerase II,RRS1,SST,STAT5a/b,TAF7,voltage-gated calcium channel,YEATS2 | 26    | 16              | Drug Metabolism, Endocrine System Development and Function, Lipid Metabolism                                             |
| 5  | ANKRD39,APP,Aspartyl Protease,CALML4,CCDC39,CFDP1,CUL3,DNAJC4,ETNPPL,HTT,INTS1 2,KCNC4,KCNMA1,KCNMB2,KCNMB3,KCNMB4,KCNU1,KCTD18,L ARP7,MASP1,MTFR1,NAALADL2,ODF2L,PEX5L,PIN1,PPA2,PRPF40B ,PRRC1,Rbfox3,RPL34,RPL3L,TBCK,WDR91,ZMAT4,ZNF706                                                                        | 20    | 13              | Cell-To-Cell Signaling and Interaction, Nervous System Development and Function, Cardiac Arrythmia                       |

**Table S6.** Description of the 17 significant *cis*-eSNPs at chromosome level.

| Chr | SNP         | bp        | fA1  | fA2  | p-value  | q-value  | Associated_Gene | Consequence           | Ensembl_GeneId     | GeneId           |
|-----|-------------|-----------|------|------|----------|----------|-----------------|-----------------------|--------------------|------------------|
| 3   | ALGA0020228 | 102155060 | 0.79 | 0.21 | 2.82E-05 | 1.52E-02 | ABCG8           | intergenic_variant    |                    |                  |
| 3   | ASGA0015479 | 102763903 | 0.79 | 0.21 | 2.82E-05 | 1.52E-02 | ABCG8           | intron_variant        | ENSSSCG00000008453 | ABCG8            |
| 3   | M1GA0004530 | 103046883 | 0.79 | 0.21 | 2.82E-05 | 1.52E-02 | ABCG8           | intron_variant        | ENSSSCG00000028599 | orthologue THADA |
| 3   | MARC0037203 | 102111329 | 0.87 | 0.13 | 6.62E-05 | 2.04E-02 | ABCG8           | intergenic_variant    |                    |                  |
| 3   | H3GA0010157 | 102401629 | 0.87 | 0.13 | 6.62E-05 | 2.04E-02 | ABCG8           | intron_variant        | ENSSSCT00000009253 | PPM1B            |
| 3   | H3GA0010212 | 104427661 | 0.72 | 0.28 | 1.49E-04 | 4.02E-02 | ABCG8           | intergenic_variant    |                    |                  |
| 3   | ALGA0020335 | 104692463 | 0.71 | 0.29 | 1.96E-04 | 4.70E-02 | ABCG8           | intergenic_variant    |                    |                  |
| 4   | ASGA0020802 | 97973034  | 0.74 | 0.26 | 8.20E-06 | 2.07E-02 | USF1            | upstream_gene_variant | ENSSSCG00000006383 | VANGL2           |
| 8   | ALGA0049276 | 122249328 | 0.93 | 0.07 | 3.83E-06 | 3.72E-03 | CYP2U1          | intron_variant        | ENSSSCG00000009150 | HADH             |
| 8   | ALGA0110177 | 122654894 | 0.41 | 0.59 | 6.02E-05 | 1.58E-02 | HADH            | intergenic_variant    |                    |                  |
| 8   | ASGA0106126 | 122655115 | 0.41 | 0.59 | 6.02E-05 | 1.58E-02 | HADH            | intergenic_variant    |                    |                  |
| 8   | ASGA0103857 | 122655547 | 0.41 | 0.59 | 6.02E-05 | 1.58E-02 | HADH            | intergenic_variant    |                    |                  |
| 8   | MARC0003202 | 122664524 | 0.41 | 0.59 | 6.02E-05 | 1.58E-02 | HADH            | intergenic_variant    |                    |                  |
| 8   | ALGA0108851 | 122072309 | 0.42 | 0.58 | 9.28E-05 | 1.95E-02 | HADH            | intergenic_variant    |                    |                  |
| 8   | ASGA0089440 | 124212852 | 0.46 | 0.54 | 1.73E-04 | 2.98E-02 | HADH            | intron_variant        | ENSSSCG00000020821 | NPNT             |
| 8   | ALGA0049269 | 121743168 | 0.42 | 0.58 | 2.48E-04 | 3.62E-02 | HADH            | intergenic_variant    |                    |                  |
| 8   | MARC0037703 | 122288920 | 0.61 | 0.39 | 2.88E-04 | 3.78E-02 | HADH            | intron_variant        | ENSSSCG00000009151 | CYP2U1           |

**Table S7.** Significant co-expression values among genes regulated by the hotspots on SSC8.

| <b>From</b> | <b>To</b> | <b>Weight</b> | <b>sign</b> |
|-------------|-----------|---------------|-------------|
| APOB        | HADH      | 0.77372545    | +           |
| AGPAT2      | PPARA     | 0.75664717    | +           |
| AGPAT2      | HADH      | 0.73869884    | +           |
| DGAT1       | APOB      | 0.724836052   | +           |
| CYP2U1      | HADH      | 0.716647029   | +           |
| DGAT1       | PPARA     | 0.71526891    | +           |
| DGAT1       | HADH      | 0.711374998   | +           |
| PPARA       | HADH      | 0.69495374    | +           |
| AGPAT2      | DGAT1     | 0.688199759   | +           |
| PPARA       | APOB      | 0.654403329   | +           |
| AGPAT2      | ESRRA     | 0.635816097   | +           |
| AGPAT2      | APOB      | 0.59262836    | +           |
| CYP2U1      | APOB      | 0.580422282   | +           |
| CYP2U1      | DGAT1     | 0.57343328    | +           |
| ESRRA       | APOB      | 0.559513271   | +           |
| ESRRA       | PPARA     | 0.530570805   | +           |
| ESRRA       | HADH      | 0.50790447    | +           |
| CYP2U1      | PPARA     | 0.499788463   | +           |
| CYP2U1      | AGPAT2    | 0.484627783   | +           |
| DGAT1       | EGF       | 0.365692794   | +           |
| AGPAT2      | EGF       | 0.325705379   | +           |
| EGF         | PPARA     | 0.309143394   | +           |
| EGF         | APOB      | 0.240296617   | +           |
| EGF         | HADH      | 0.240153566   | +           |

**Table S9.** List of primers for the RT-qPCR analysis.

| Gene            | Full name                                                            | Type       | Primer sequence             |                              |
|-----------------|----------------------------------------------------------------------|------------|-----------------------------|------------------------------|
|                 |                                                                      |            | Forward                     | Reverse                      |
| <i>ABCG8</i>    | ATP binding cassette subfamily G member 8                            | Target     | ATGTCCGCCCTCTTGTTCAT        | TCCGAGTGGCATTGGAGAT          |
| <i>ACSM5</i>    | acyl-CoA synthetase medium-chain family member 5                     | Target     | TGTAATCTGTGCCAATCCCAAA      | CATCATCTACGATCTGCACCTCAT     |
| <i>ACTB</i>     | actin beta                                                           | Endogenous | CAAGGACCTCTACGCCAACAC       | TGGAGGCGCGATGATCTT           |
| <i>AGPAT2</i>   | 1-acylglycerol-3-phosphate O-acyltransferase 2                       | Target     | CATGGTCAGGGAGAAGCTCAA       | GCCAGGTAGAAGGCACCTTTC        |
| <i>APOA2</i>    | apolipoprotein A2                                                    | Target     | AACTTCAAACCTCAGGCCAAGACTTA  | GGCCAATGAAACTGCTCAAGA        |
| <i>APOB</i>     | apolipoprotein B                                                     | Target     | CCACCAAGATCAACTGCAAGGT      | GGAGCAGTGGCTGGTCTTCA         |
| <i>ARNT</i>     | aryl hydrocarbon receptor nuclear translocator                       | Target     | TCTAATGATAAGGAGCGGTTTGC     | TATGATTTTCCCTGGCGAGTCT       |
| <i>B2M</i>      | beta-2-microglobulin                                                 | Endogenous | ACCTTCTGGTCCACACTGAGTTC     | GGTCTCGATCCCCTTAACCTATCTTG   |
| <i>MLXIPL</i>   | MLX interacting protein like                                         | Target     | CCCAAGTGGAGAATTTCAAAGG      | CTTCTCCGCTCCACATACTG         |
| <i>CPT1A</i>    | carnitine palmitoyltransferase 1A                                    | Target     | CCTGAAGGTGCTGCTCTCCTA       | CTCACCATCATCATCCAGATCTTG     |
| <i>CROT</i>     | carnitine O-octanoyltransferase                                      | Target     | GGGAAACGAAAATTGGTTGGA       | CGCAAAGTTGACATTCAGTTGTG      |
| <i>CYP2U1</i>   | cytochrome P450 family 2 subfamily U member 1                        | Target     | AGAGAAAACAGTGCTCCAAGGGTAT   | TGGCTGGGTCTCTGTGTACTGA       |
| <i>CYP7A1</i>   | cytochrome P450 family 7 subfamily A member 1                        | Target     | TGACGCAGAGAAAAGCCAAGTC      | TTCAGAAGCTGCTTTCATTGCT       |
| <i>DGAT1</i>    | diacylglycerol O-acyltransferase 1                                   | Target     | CCTGAATTGGTGTGTGGTCATG      | GATGCCGTACTIONTGTAGAGTTCTC   |
| <i>EGF</i>      | epidermal growth factor                                              | Target     | AACGGGAATGCCACTTGTGT        | CCTTCCAAGTCAATCCTAAAGATACTG  |
| <i>ELOVL5</i>   | ELOVL fatty acid elongase 5                                          | Target     | CCTCTCGGCTGGCTGTACTT        | CCTTCTTGTTGAGGTCTGGATGTAG    |
| <i>ELOVL6</i>   | ELOVL fatty acid elongase 6                                          | Target     | AGCAGTTCACGAGAACGAAGCC      | TGCCGACCGCCAAAGATAAAG        |
| <i>ESRRA</i>    | estrogen related receptor alpha                                      | Target     | CAAGAGCATCCCAGGCTTCTC       | CACCCAACACCAATACCTCCAT       |
| <i>FABP1</i>    | fatty acid binding protein 1                                         | Target     | AAGGTCGTCCAGAATGAGTTCAC     | TTCCAACGAACCACTGTCTTGA       |
| <i>FABP5</i>    | fatty acid binding protein 5 (psoriasis-associated)                  | Target     | CCAATGGAGAATTGGTCAACA       | GTTCATGACGCATACCACCACTA      |
| <i>FADS1</i>    | fatty acid desaturase 1                                              | Target     | CCTTGTGAGGAAGTATATGAGCTCTCT | TCATCTGTGAGCTCTTTATTCTTAGTCG |
| <i>FADS2</i>    | fatty acid desaturase 2                                              | Target     | TCCACCGCGACCTTGATTTA        | TCGGTGTATCTCAGAGTTCTTGGT     |
| <i>FADS3</i>    | fatty acid desaturase 3                                              | Target     | CCAGCACCTCTACTTCTTCTGAT     | CATGTATGCCAGATTTTCCACTTC     |
| <i>FOXA1</i>    | forkhead box A1                                                      | Target     | ACAGTACTACGCGGACACACA       | ATGGTGCTCAGACCCGAGTT         |
| <i>HADH</i>     | hydroxyacyl-CoA dehydrogenase                                        | Target     | AGCTCTTCAAGAGGCTGGACAA      | TTGTGATCTGCAAAGAGGAAGTG      |
| <i>HNF4A</i>    | hepatocyte nuclear factor 4 alpha                                    | Target     | GACCATGGGCAATGACACATC       | GCACACAAGGCGCTGACA           |
| <i>HNF4G</i>    | hepatocyte nuclear factor 4 gamma                                    | Target     | GTCTTGGTGGAAATGGGCTAAAT     | CTCTCAACAGTGCCACCTGATC       |
| <i>HPRT1</i>    | hypoxanthine phosphoribosyltransferase 1                             | Endogenous | TCATTATGCCGAGGATTTGGA       | CTCTTTCATCAGATCTCGAGCAA      |
| <i>KLF10</i>    | Kruppel like factor 10                                               | Target     | ACGATCCCAGCATTTTGTGTTG      | TGGTGCCATCAGATTTGACACT       |
| <i>LIPC</i>     | lipase C, hepatic type                                               | Target     | CGTTACAGCAGTGTGGCTTCA       | CCAGCAAGCCATCCATCAA          |
| <i>LPIN1</i>    | lipin 1                                                              | Target     | CCGAGAGAAGGTGGTGGACAT       | CTCTCCATTGTCTCCAGTTTCA       |
| <i>MTTP</i>     | microsomal triglyceride transfer protein                             | Target     | GAGGTCCAGGTTGGTCTAGCTATT    | AGTTATTACCACGGTTACCCGATTT    |
| <i>NFKB1</i>    | nuclear factor of kappa light polypeptide gene enhancer in B-cells 1 | Target     | CCCACAGACGTTTATAGACAATTT    | GAGGCTGGTTTTGTAATGTTGACA     |
| <i>NR1H3</i>    | nuclear receptor subfamily 1, group H, member 3                      | Target     | CTGGGCATGATCGAGAAGCT        | TGGGCCAAGGCGTGACT            |
| <i>NR2E1</i>    | nuclear receptor subfamily 2 group E member 1                        | Target     | GGAATAGCACAAATGGGCCATT      | TTGTCACCATTTCATGCCAGATA      |
| <i>PEX2</i>     | peroxisomal biogenesis factor 2                                      | Target     | CTCAGACTCCTAAGAAACCTTCAGAGA | ACTGATCTGAGCACTCTGTTTGC      |
| <i>PLA2G12A</i> | phospholipase A2, group XIIA                                         | Target     | CCCCTCTTTGGTGTTCATCTTAA     | ATAGCACCTGTCTGTCTGGTT        |
| <i>PLCB2</i>    | phospholipase C beta 2                                               | Target     | AGATCTTCACTTCTACCCTCCAA     | GCGCTGTTCTGTGTTGATGA         |
| <i>POU2F1</i>   | POU class 2 homeobox 1                                               | Target     | CCCATACAGATCGCACAGGAT       | GATGATAAACTGTGCTGGTTGCA      |
| <i>PPAP2A</i>   | phosphatidic acid phosphatase type 2A                                | Target     | GGCCACTTCTATTCTCCATGTAC     | AGGCCACGTAATGGATACAG         |

|                 |                                                                       |            |                           |                          |
|-----------------|-----------------------------------------------------------------------|------------|---------------------------|--------------------------|
| <i>PPARA</i>    | peroxisome proliferator activated receptor alpha                      | Target     | GGCACTGAACATCGAATGTAGAATC | CCGAAAGAAGCCCTTGCAA      |
| <i>PPARD</i>    | peroxisome proliferator activated receptor delta                      | Target     | GCATGTCTCACAACGCCATT      | GCTGACTCCCCTCGTTTGC      |
| <i>PPARGCIA</i> | peroxisome proliferator-activated receptor gamma, coactivator 1 alpha | Target     | CTCTGGAAGTGCAGGCCTAA      | TGGAGAAGCCCTAAAAGGGTTAT  |
| <i>SCAP</i>     | SREBF chaperone                                                       | Target     | AGATATCTCAGGCCTTCTACAACCA | AGTTTCAACAGTGGGTAGCAGC   |
| <i>SCD1</i>     | stearoyl-CoA desaturase (delta-9-desaturase)                          | Target     | GGTGATGTTCCAGAGGAGGTACTAC | CAGCAATACCAGGGCACGAT     |
| <i>SREBF1</i>   | sterol regulatory element binding transcription factor 1              | Target     | CACGGAGGCGAAGCTGAATA      | GCTTCTGGTTGCTCTGCTGAA    |
| <i>TBP</i>      | TATA box binding protein                                              | Endogenous | CAGAAATGATCAAACCGAGAATTGT | CTGCTCTGACTTTAGCACCTGTAA |
| <i>USF1</i>     | upstream transcription factor 1                                       | Target     | CCCTTATCCCCGAAGTCAGA      | GCGGCGTTCCACTTCATTAT     |
